# Supplementary material
Source: PubMed Central journal article supplement (PMC3305848)
Supplement: NIHMS336703-supplement-supplement_1.pdf [file NIHMS336703-supplement-supplement_1.pdf]

## Supplementary data

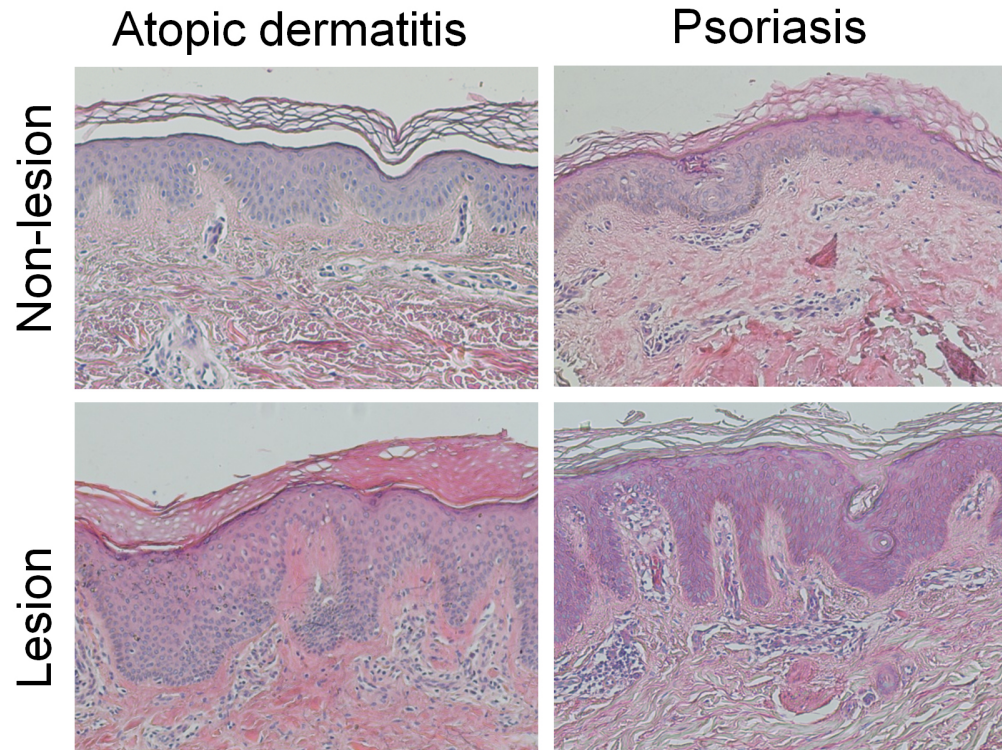**Supplementary data figure 1**

The same sections shown in figure 5d were subjected to H&E stain. Images obtained using 10x magnification.
